# Supplementary material for: Comparison of secondary organic aerosol generated from the oxidation of laboratory precursors by hydroxyl radicals, chlorine atoms, and bromine atoms in an oxidation flow reactor
Source: Royal Society of Chemistry journal article supplement (doi:10.1039/d2ea00018k), 2022-01-01
Supplement: d2ea00018k1.pdf [file d2ea00018k1.pdf]

Cite this: DOI: 00.0000/xxxxxxxxxx

## Supplementary Information: Comparison of Secondary Organic Aerosol Generated From the Oxidation of Laboratory Precursors by Hydroxyl Radicals, Chlorine Atoms, and Bromine Atoms in an Oxidation Flow Reactor

Andrew T. Lambe,<sup>\*a</sup> Anita M. Avery<sup>a</sup>, Nirvan Bhattacharyya<sup>b</sup>, Dongyu S. Wang<sup>b‡</sup>, Mrinali Modi<sup>b</sup>, Catherine G. Masoud<sup>b</sup>, Lea Hildebrandt Ruiz<sup>b</sup>, and William H. Brune<sup>c</sup>

Received Date  
Accepted Date

DOI: 00.0000/xxxxxxxxxx

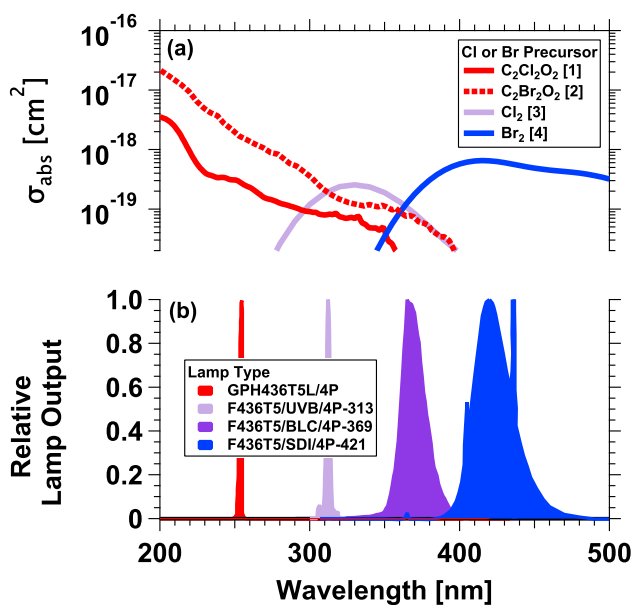

**Fig. S1** (a) Absorption cross sections of Cl and Br precursors used in this study, with references as noted: <sup>1</sup>C<sub>2</sub>Cl<sub>2</sub>O<sub>2</sub>, <sup>2</sup>C<sub>2</sub>Br<sub>2</sub>O<sub>2</sub>, <sup>2,3</sup>Cl<sub>2</sub>, <sup>4</sup>Br<sub>2</sub>. (b) Normalized emission spectra for low-pressure GPH436T5L/4P, F436T5/UVB/4P-313, F436T5/BLC/4P-369, and F436T5/SDI/4P-421 mercury lamps used in this study. Spectra are provided by the manufacturer (GPH436T5L/4P: Light Sources Inc.; all others: LCD Lighting, Inc).

<sup>a</sup> Aerodyne Research Inc., Billerica, Massachusetts, USA; E-mail: lambe@aerodyne.com

<sup>b</sup> University of Texas at Austin, Austin, Texas, USA

<sup>c</sup> Pennsylvania State University, University Park, PA, USA

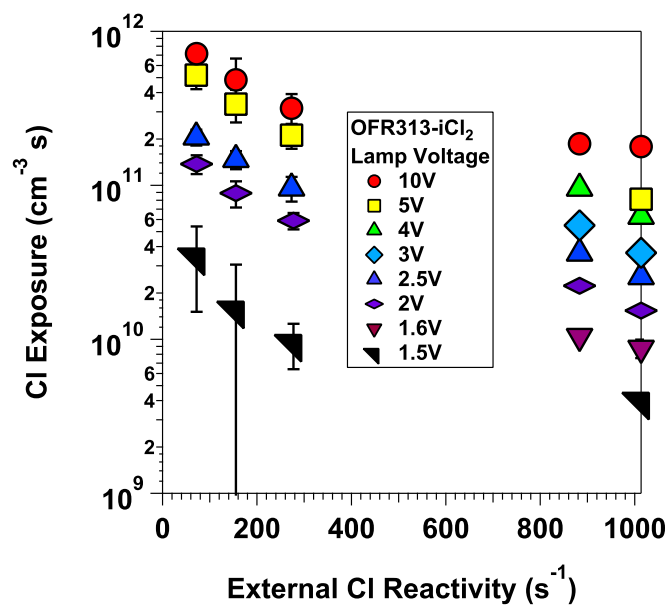

**Fig. S2** CI exposure calibration data obtained as a function of lamp voltage and external CI reactivity for the OFR313-iCl<sub>2</sub> method. These data were obtained at  $\tau_{OFR} = 130$  s with 12 ppm Cl<sub>2</sub> injected into the OFR. Error bars represent  $\pm 1\sigma$  in replicate measurements.

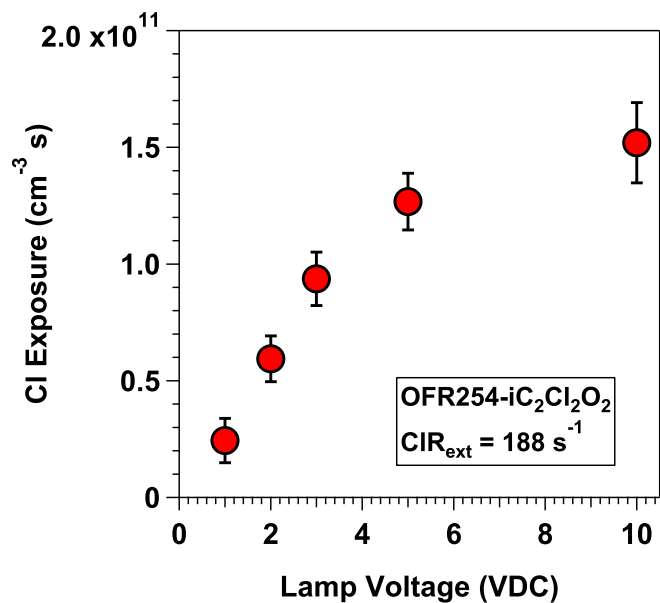

**Fig. S3** CI exposure calibration data obtained as a function of lamp voltage for the OFR254-iC<sub>2</sub>Cl<sub>2</sub>O<sub>2</sub> method. These data were obtained at  $\tau_{OFR} = 90$  s with 4.2 ppm C<sub>2</sub>Cl<sub>2</sub>O<sub>2</sub> and 636 ppb O<sub>3</sub> injected into the OFR. Error bars represent  $\pm 1\sigma$  in replicate measurements.

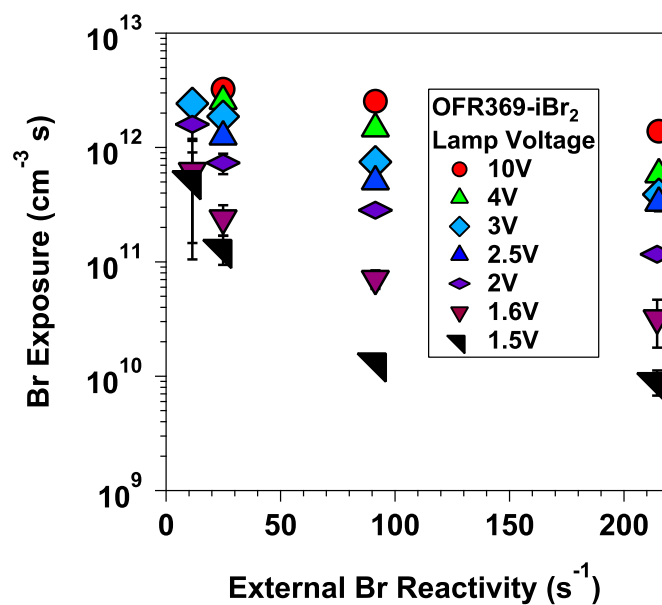

**Fig. S4** Br exposure calibration data obtained as a function of lamp voltage and external Br reactivity for the OFR369-iBr<sub>2</sub> method. These data were obtained at  $\tau_{OFR} = 130$  s with 1.9 ppm Br<sub>2</sub> injected into the OFR. Error bars represent  $\pm 1\sigma$  in replicate measurements.

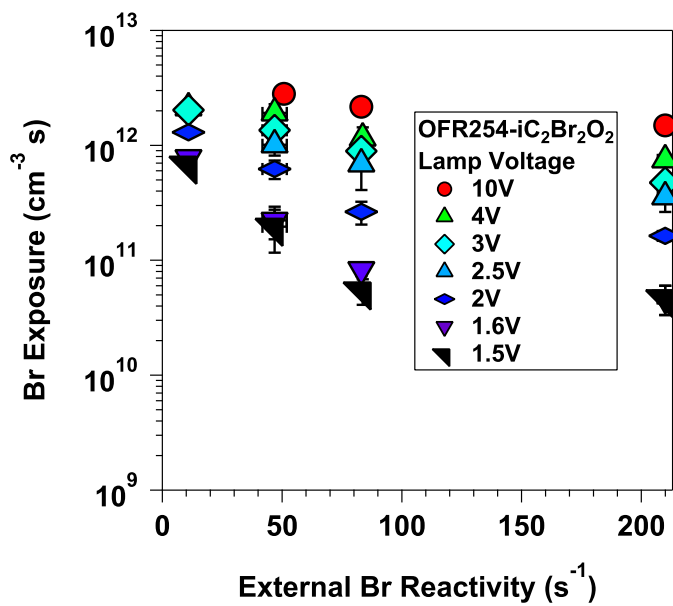

**Fig. S5** Br exposure calibration data obtained as a function of lamp voltage and external Br reactivity for the OFR254-iC<sub>2</sub>Br<sub>2</sub>O<sub>2</sub> method. These data were obtained at  $\tau_{OFR} = 130$  s with 1.8 ppm C<sub>2</sub>Br<sub>2</sub>O<sub>2</sub> injected into the OFR. Error bars represent  $\pm 1\sigma$  in replicate measurements.

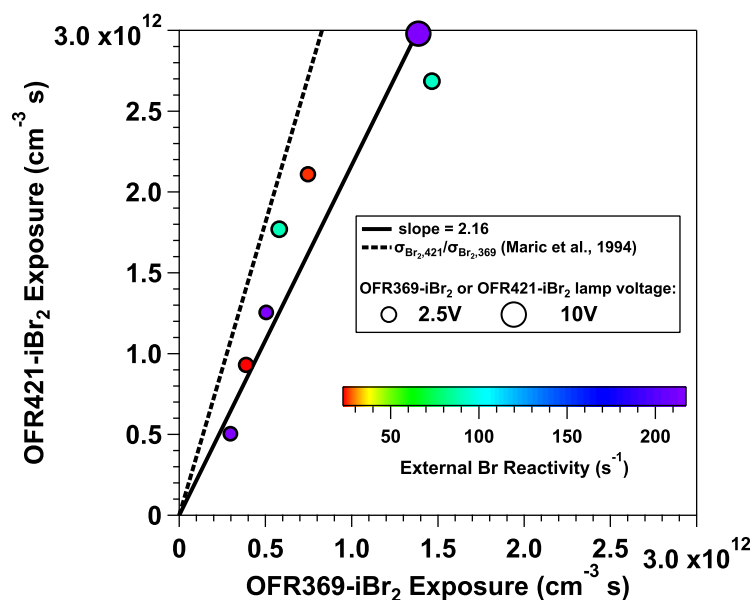

**Fig. S6** Relationship between Br exposure obtained using OFR421-iBr<sub>2</sub> and OFR369-iBr<sub>2</sub> methods at equivalent lamp voltages and external Br reactivity values. Symbols are sized by lamp voltage and colored by external Br reactivity values. The solid linear regression line has a slope of 2.16. The dashed line represents a line with a slope of Br<sub>2</sub> absorption cross sections at 369 and 421 nm from Maric *et al.*<sup>5</sup>.

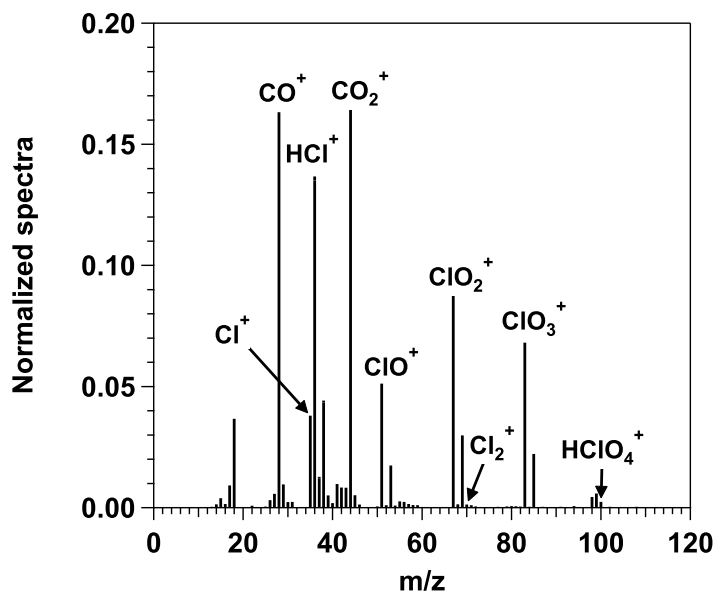

**Fig. S7** L-ToF-AMS spectrum obtained during OFR conditioning with humidified air, O<sub>3</sub>, and OH (generated using OFR185) immediately following Cl-OFR experiments conducted using OFR254-iC<sub>2</sub>Cl<sub>2</sub>O<sub>2</sub>. Similar spectra were obtained after OFR185 conditioning following OFR313/369-iCl<sub>2</sub> studies.

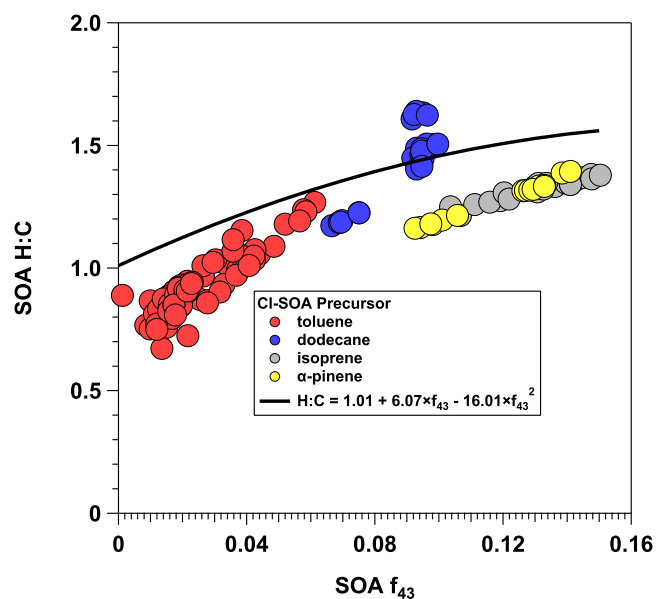

**Fig. S8** CI-SOA hydrogen-to-carbon (H/C) ratio as a function of the fraction of CI-SOA signal measured at  $m/z = 43$  ( $f_{43}$ ). Here, H/C and  $f_{43}$  were obtained from L-ToF-AMS spectra. Solid black line is a quadratic regression line from Ng *et al.* <sup>6</sup>.

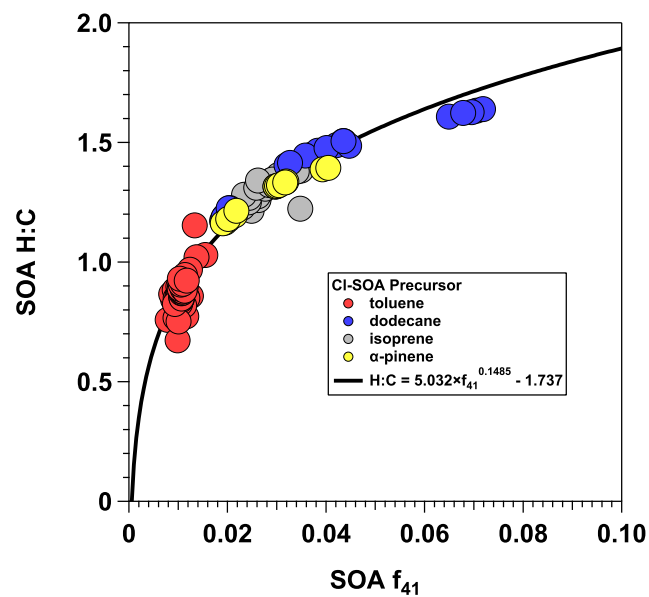

**Fig. S9** CI-SOA hydrogen-to-carbon (H/C) ratio as a function of the fraction of CI-SOA signal measured at  $m/z = 41$  ( $f_{41}$ ). H/C and  $f_{41}$  were obtained from L-ToF-AMS spectra. Solid black line is a power law regression line fit to the data.

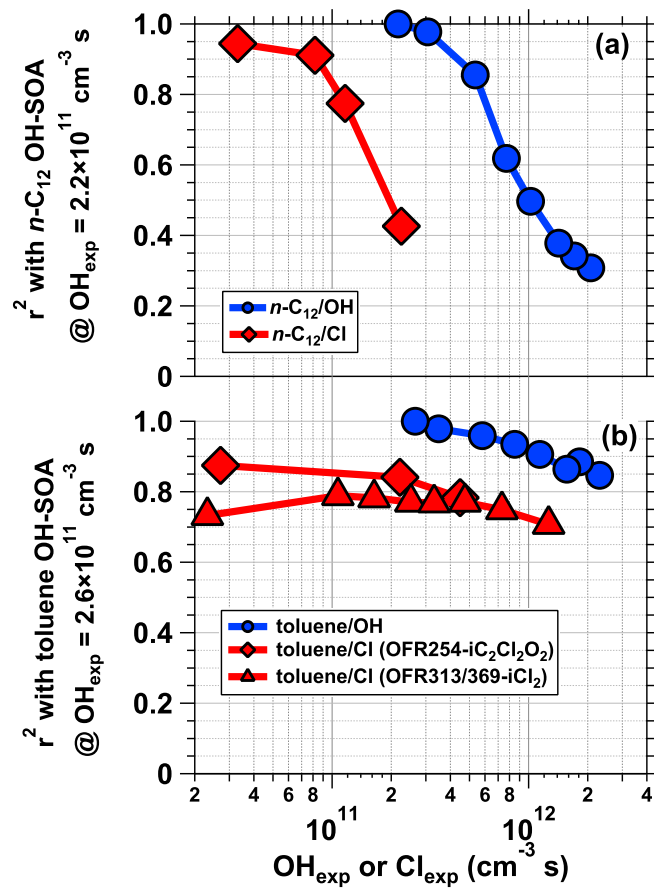

**Fig. S10** Square of the Pearson correlation coefficient ( $r^2$ ) between L-ToF-AMS spectra of (a)  $n\text{-C}_{12}$  OH-SOA generated at  $\text{OH}_{\text{exp}} = 2.2 \times 10^{11} \text{ cm}^{-3} \text{ s}$  and  $n\text{-C}_{12}$  OH-/Cl-SOA obtained as a function of  $\text{OH}_{\text{exp}}$  or  $\text{Cl}_{\text{exp}}$  (b) toluene OH-SOA generated at  $\text{OH}_{\text{exp}} = 2.6 \times 10^{11} \text{ cm}^{-3} \text{ s}$  with toluene OH-/Cl-SOA spectra obtained as a function of  $\text{OH}_{\text{exp}}$  or  $\text{Cl}_{\text{exp}}$ .

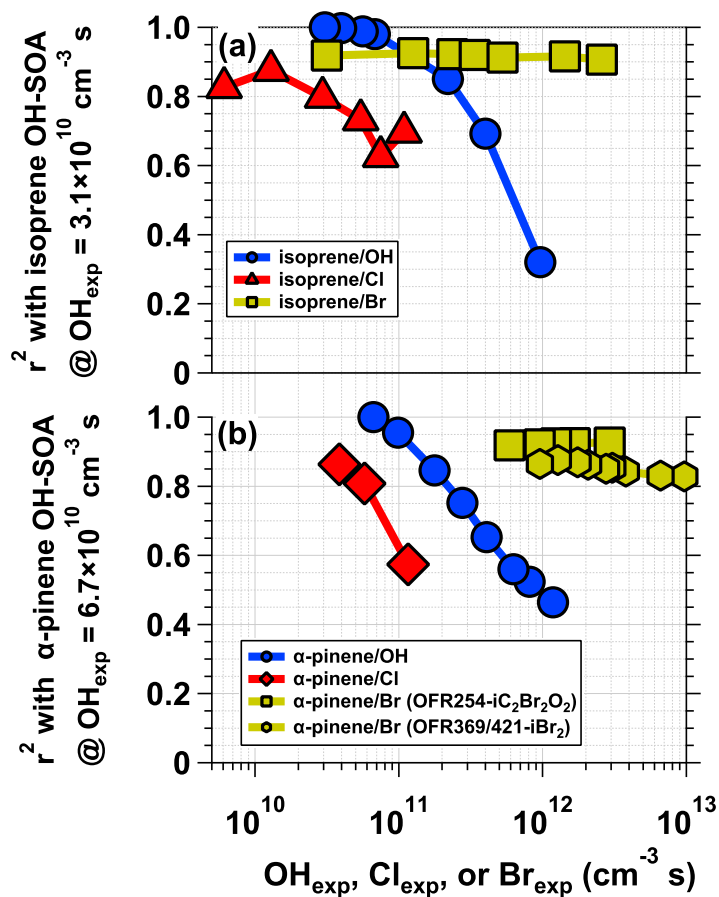

**Fig. S11** Square of the Pearson correlation coefficient ( $r^2$ ) between L-ToF-AMS spectra of (a) isoprene OH-SOA generated at  $\text{OH}_{\text{exp}} = 3.1 \times 10^{10} \text{ cm}^{-3} \text{ s}$  and isoprene OH-/Cl-/Br-SOA obtained as a function of  $\text{OH}_{\text{exp}}$ ,  $\text{Cl}_{\text{exp}}$  or  $\text{Br}_{\text{exp}}$  (b)  $\alpha$ -pinene OH-SOA generated at  $\text{OH}_{\text{exp}} = 6.7 \times 10^{10} \text{ cm}^{-3} \text{ s}$  with  $\alpha$ -pinene OH-/Cl-/Br-SOA spectra obtained as a function of  $\text{OH}_{\text{exp}}$ ,  $\text{Cl}_{\text{exp}}$ , or  $\text{Br}_{\text{exp}}$ .

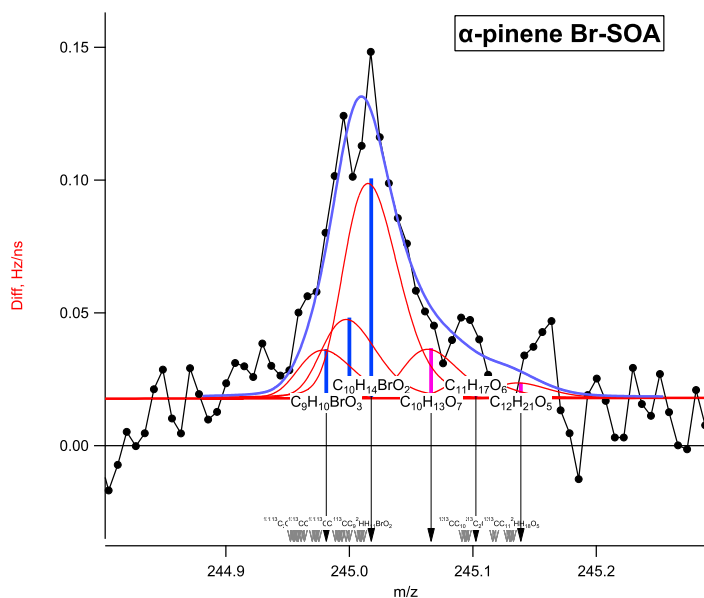

**Fig. S12** High-resolution L-ToF-AMS spectrum of  $\alpha$ -pinene Br-SOA at  $m/z = 245$ . Multiple ions were assigned to the peak at  $m/z=245$ , with the largest contribution coming from  $\text{C}_{10}\text{H}_{14}\text{BrO}_2^+$ , followed by  $\text{C}_9\text{H}_{10}\text{BrO}_3^+$  and  $\text{C}_{10}\text{H}_{12}^{81}\text{BrO}_2^+$ .

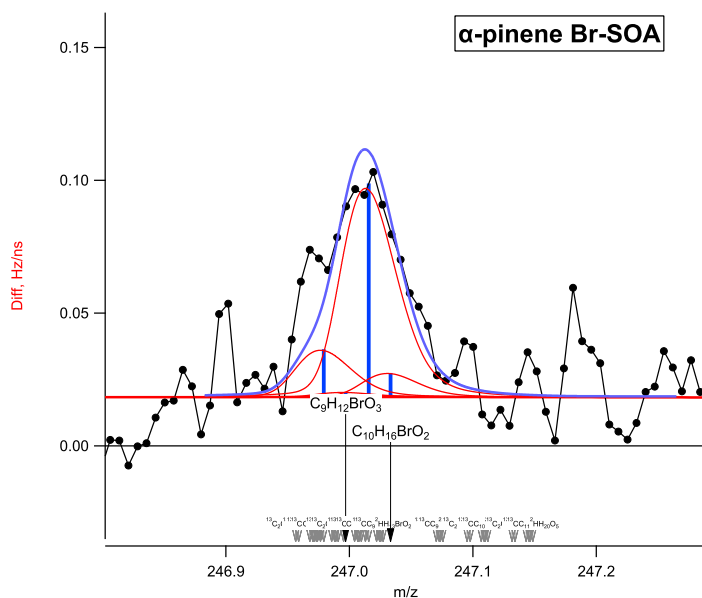

**Fig. S13** High-resolution L-ToF-AMS spectrum of  $\alpha$ -pinene Br-SOA at  $m/z = 247$ . Multiple ions were assigned to the peak at  $m/z=247$ , with the largest contribution coming from  $C_{10}H_{14}^{81}BrO_2^+$ , followed by  $C_9H_{12}BrO_3^+$  and  $C_{10}H_{16}BrO_2^+$ .

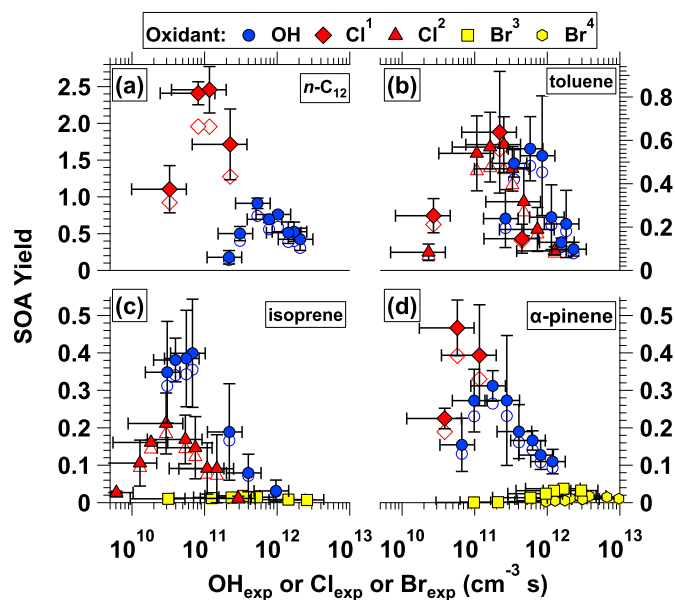

**Fig. S14** Mass yields of SOA generated from (a) OH and Cl oxidation of  $n$ -C<sub>12</sub>, (b) OH and Cl oxidation of toluene, (c) OH, Cl, and Br oxidation of isoprene, and (d) OH, Cl, and Br oxidation of  $\alpha$ -pinene as a function of  $OH_{exp}$ ,  $Cl_{exp}$ , or  $Br_{exp}$ . Closed symbols represent SOA yield values with particle wall loss correction factors applied; open symbols represent the same data without particle wall loss correction factors. Different y-axis scales are used in each subpanel. Error bars indicate  $\pm 1\sigma$  uncertainty in binned SOA yield values,  $\pm 50\%$  uncertainty in OH exposure values, and  $\pm 70\%$  uncertainty in Cl and Br exposure values. Additional figure notes: <sup>1</sup>Cl generated using OFR254/313- $i$ -C<sub>2</sub>Cl<sub>2</sub>O<sub>2</sub>; <sup>2</sup>Cl generated using OFR313/369- $i$ -Cl<sub>2</sub>; <sup>3</sup>Br generated using OFR254- $i$ -C<sub>2</sub>Br<sub>2</sub>O<sub>2</sub>; <sup>4</sup>Br generated using OFR369/421- $i$ -Br<sub>2</sub>.



**Table S1** KinSim mechanism used to model Cl and Br formation and destruction in the OFR.

| Reactant 1                                    | Reactant 2                     | Product 1                      | Product 2          | Product 3 | $A_\infty$              | $E_\infty$ | $n_\infty$ | $A_0$                  | $E_0$ | $n_0$ | References |
|-----------------------------------------------|--------------------------------|--------------------------------|--------------------|-----------|-------------------------|------------|------------|------------------------|-------|-------|------------|
| Cl <sub>2</sub>                               | HV254                          | 2 Cl                           |                    |           | $7.26 \times 10^{-22}$  | 0          | 0          | 0                      | 0     | 0     | 4          |
| Cl <sub>2</sub>                               | HV313                          | 2 Cl                           |                    |           | $2.032 \times 10^{-19}$ | 0          | 0          | 0                      | 0     | 0     | 4          |
| Cl <sub>2</sub>                               | HV369                          | 2 Cl                           |                    |           | $8.828 \times 10^{-20}$ | 0          | 0          | 0                      | 0     | 0     | 4          |
| Cl <sub>2</sub>                               | O( <sup>1</sup> D)             | Cl <sub>2</sub>                | O( <sup>3</sup> P) |           | $2.19 \times 10^{-10}$  | 0          | 0          | 0                      | 0     | 0     | 7          |
| Cl <sub>2</sub>                               | O( <sup>1</sup> D)             | ClO                            | Cl                 |           | $1.99 \times 10^{-10}$  | 0          | 0          | 0                      | 0     | 0     | 8          |
| Cl <sub>2</sub>                               | O( <sup>3</sup> P)             | ClO                            | Cl                 |           | $4.17 \times 10^{-12}$  | 1370       | 0          | 0                      | 0     | 0     | 9          |
| Cl <sub>2</sub>                               | OH                             | HOCl                           | Cl                 |           | $3.6 \times 10^{-12}$   | 1200       | 0          | 0                      | 0     | 0     | 9          |
| Cl <sub>2</sub>                               | Cl                             | Cl <sub>3</sub>                |                    |           | $1.51 \times 10^{-16}$  | 0          | 0          | 0                      | 0     | 0     | 10         |
| Cl <sub>2</sub>                               | Br                             | BrCl                           | Cl                 |           | $1.1 \times 10^{-15}$   | 0          | 0          | 0                      | 0     | 0     | 11         |
| Cl <sub>2</sub>                               | ClCO                           | COCl <sub>2</sub>              | Cl                 |           | $4.18 \times 10^{-12}$  | 1490.14    | 0          | 0                      | 0     | 0     | 12         |
| C <sub>2</sub> Cl <sub>2</sub> O <sub>2</sub> | HV254                          | 2 Cl                           | 2 CO               |           | $2.76 \times 10^{-19}$  | 0          | 0          | 0                      | 0     | 0     | 1          |
| C <sub>2</sub> Cl <sub>2</sub> O <sub>2</sub> | HV313                          | 2 Cl                           | 2 CO               |           | $8.19 \times 10^{-20}$  | 0          | 0          | 0                      | 0     | 0     | 1          |
| C <sub>2</sub> Cl <sub>2</sub> O <sub>2</sub> | Cl                             | Cl <sub>2</sub>                | CO                 | COCl      | $4 \times 10^{-14}$     | 0          | 0          | 0                      | 0     | 0     | 13         |
| Br <sub>2</sub>                               | HV369                          | 2 Br                           |                    |           | $1.78 \times 10^{-19}$  | 0          | 0          | 0                      | 0     | 0     | 5          |
| Br <sub>2</sub>                               | HV421                          | 2 Br                           |                    |           | $6.45 \times 10^{-19}$  | 0          | 0          | 0                      | 0     | 0     | 5          |
| Br <sub>2</sub>                               | O( <sup>3</sup> P)             | BrO                            | Br                 |           | $5.11 \times 10^{-13}$  | -989       | 0          | 0                      | 0     | 0     | 14         |
| Br <sub>2</sub>                               | OH                             | Br                             | HOBr               |           | $2 \times 10^{-11}$     | 240.558    | 0          | 0                      | 0     | 0     | 9          |
| Br <sub>2</sub>                               | Cl                             | Br                             | BrCl               |           | $2.3 \times 10^{-10}$   | 134.713    | 0          | 0                      | 0     | 0     | 15         |
| C <sub>2</sub> Br <sub>2</sub> O <sub>2</sub> | HV254                          | 2 Br                           | 2 CO               |           | $1.68 \times 10^{-18}$  | 0          | 0          | 0                      | 0     | 0     | 3          |
| C <sub>2</sub> Br <sub>2</sub> O <sub>2</sub> | Br                             | Br <sub>2</sub>                | CO                 | COBr      | $4 \times 10^{-14}$     | 0          | 0          | 0                      | 0     | 0     | 16         |
| O <sub>3</sub>                                | HV254                          | O <sub>2</sub>                 | O( <sup>1</sup> D) |           | $1.03 \times 10^{-17}$  | 0          | 0          | 0                      | 0     | 0     | 17         |
| O <sub>3</sub>                                | HV313                          | O <sub>2</sub>                 | O( <sup>1</sup> D) |           | $6.84 \times 10^{-20}$  | 0          | 0          | 0                      | 0     | 0     | 17         |
| O <sub>3</sub>                                | HV369                          | O <sub>2</sub>                 | O( <sup>1</sup> D) |           | $3.59 \times 10^{-23}$  | 0          | 0          | 0                      | 0     | 0     | 17         |
| O <sub>3</sub>                                | HV421                          | O <sub>2</sub>                 | O( <sup>1</sup> D) |           | $6.47 \times 10^{-23}$  | 0          | 0          | 0                      | 0     | 0     | 17         |
| O <sub>3</sub>                                | Cl                             | ClO                            | O <sub>2</sub>     |           | $2.3 \times 10^{-11}$   | 200        | 0          | 0                      | 0     | 0     | 9          |
| O <sub>3</sub>                                | ClO                            | O <sub>2</sub>                 | OCLO               |           | $1 \times 10^{-18}$     | 0          | 0          | 0                      | 0     | 0     | 9          |
| O <sub>3</sub>                                | ClO                            | O <sub>2</sub>                 | CLOO               |           | $1.5 \times 10^{-17}$   | 0          | 0          | 0                      | 0     | 0     | 9          |
| O <sub>3</sub>                                | OCLO                           | O <sub>2</sub>                 | ClO <sub>3</sub>   |           | $2.1 \times 10^{-12}$   | 4700       | 0          | 0                      | 0     | 0     | 9          |
| O <sub>3</sub>                                | Cl <sub>2</sub> O <sub>2</sub> | O <sub>2</sub>                 | CLOO               | ClO       | $1 \times 10^{-19}$     | 0          | 0          | 0                      | 0     | 0     | 9          |
| O <sub>3</sub>                                | Br                             | O <sub>2</sub>                 | BrO                |           | 1.7E-11                 | 799.856    | 0          | 0                      | 0     | 0     | 9          |
| O <sub>3</sub>                                | BrO                            | 2 O <sub>2</sub>               | Br                 |           | 2E-17                   | 0          | 0          | 0                      | 0     | 0     | 18         |
| O <sub>3</sub>                                | BrO <sub>2</sub>               |                                |                    |           | 5E-16                   | 0          | 0          | 0                      | 0     | 0     | 19         |
| Cl                                            | OH                             | HCl                            | O( <sup>3</sup> P) |           | $9.8 \times 10^{-12}$   | 2860.24    | 0          | 0                      | 0     | 0     | 20         |
| Cl                                            | HO <sub>2</sub>                | HCl                            | O <sub>2</sub>     |           | $1.4 \times 10^{-11}$   | -270       | 0          | 0                      | 0     | 0     | 9          |
| Cl                                            | HO <sub>2</sub>                | OH                             | ClO                |           | $6.3 \times 10^{-11}$   | 570.123    | 0          | 0                      | 0     | 0     | 9          |
| Cl                                            | Cl                             | Cl <sub>2</sub>                |                    |           | 6.15E-34                | -905.701   | 0          | 0                      | 0     | 0     | 20         |
| Cl                                            | O <sub>2</sub>                 | CLOO                           |                    |           | 0                       | 0          | 0          | $1.4 \times 10^{-33}$  | 0     | 3.9   | 9          |
| Cl                                            | H <sub>2</sub>                 | HCl                            | H                  |           | $3.9 \times 10^{-11}$   | 2310.56    | 0          | 0                      | 0     | 0     | 9          |
| Cl                                            | H <sub>2</sub> O <sub>2</sub>  | HCl                            | HO <sub>2</sub>    |           | $1.1 \times 10^{-11}$   | 980        | 0          | 0                      | 0     | 0     | 9          |
| Cl                                            | CO                             | ClCO                           |                    |           | $3.4 \times 10^{-14}$   | 0          | 0          | 0                      | 0     | 0     | 21         |
| ClCO                                          |                                | Cl                             | CO                 |           | $4.1 \times 10^{-10}$   | 2960.07    | 0          | 0                      | 0     | 0     | 9          |
| Cl                                            | ClCO                           | Cl <sub>2</sub>                | CO                 |           | $2.16 \times 10^{-9}$   | 1670.68    | 0          | 0                      | 0     | 0     | 20         |
| ClO                                           | HV254                          | Cl                             | O( <sup>3</sup> P) |           | $4.25 \times 10^{-18}$  | 0          | 0          | 0                      | 0     | 0     | 22         |
| ClO                                           | HV313                          | Cl                             | O( <sup>3</sup> P) |           | $3.25 \times 10^{-19}$  | 0          | 0          | 0                      | 0     | 0     | 22         |
| ClO                                           | O( <sup>3</sup> P)             | Cl                             | O <sub>2</sub>     |           | $2.5 \times 10^{-11}$   | -109.454   | 0          | 0                      | 0     | 0     | 9          |
| ClO                                           | OH                             | HCl                            | O <sub>2</sub>     |           | $1.2 \times 10^{-12}$   | 0          | 0          | 0                      | 0     | 0     | 9          |
| ClO                                           | OH                             | HO <sub>2</sub>                | Cl                 |           | $1.9 \times 10^{-11}$   | 0          | 0          | 0                      | 0     | 0     | 9          |
| ClO                                           | HO <sub>2</sub>                | O <sub>2</sub>                 | HOCl               |           | $4.8 \times 10^{-13}$   | 700.024    | 0          | 0                      | 0     | 0     | 23         |
| ClO                                           | HO <sub>2</sub>                | HCl                            | O <sub>3</sub>     |           | $2.01 \times 10^{-14}$  | 0          | 0          | 0                      | 0     | 0     | 24         |
| ClO                                           | Cl                             | Cl <sub>2</sub>                | O( <sup>3</sup> P) |           | $1.74 \times 10^{-12}$  | 4589.85    | 0          | 0                      | 0     | 0     | 20         |
| ClO                                           | ClO                            | OCLO                           | Cl                 |           | $3.5 \times 10^{-13}$   | 1370       | 0          | 0                      | 0     | 0     | 9          |
| ClO                                           | ClO                            | Cl <sub>2</sub> O <sub>2</sub> |                    |           | $1 \times 10^{-11}$     | 0          | 0          | $2.05 \times 10^{-32}$ | 0     | 4     | 9          |

**Table S1** KinSim mechanism used to model Cl and Br formation and destruction in the OFR (continued).

|                                |                    |                                |                    |                         |          |   |                       |      |     |       |
|--------------------------------|--------------------|--------------------------------|--------------------|-------------------------|----------|---|-----------------------|------|-----|-------|
| ClO                            | ClO                | ClOO                           | Cl                 | $8.06 \times 10^{-15}$  | 0        | 0 | 0                     | 0    | 0   | 9     |
| ClO                            | ClO                | O <sub>2</sub>                 | 2 Cl               | $3 \times 10^{-11}$     | 2450     | 0 | 0                     | 0    | 0   | 25    |
| ClO                            | ClO                | O <sub>2</sub>                 | Cl <sub>2</sub>    | $1 \times 10^{-12}$     | 1590     | 0 | 0                     | 0    | 0   | 9     |
| ClO                            | BrO                | OCLO                           | Br                 | $1.6 \times 10^{-12}$   | -430.599 | 0 | 0                     | 0    | 0   | 9     |
| ClO                            | BrO                | ClOO                           | Br                 | $2.9 \times 10^{-12}$   | -220.111 | 0 | 0                     | 0    | 0   | 9     |
| ClO                            | BrO                | BrCl                           | O <sub>2</sub>     | $5.8 \times 10^{-13}$   | -169.593 | 0 | 0                     | 0    | 0   | 9     |
| OCLO                           | HV254              | ClO                            | O( <sup>3</sup> P) | $3.49 \times 10^{-19}$  | 0        | 0 | 0                     | 0    | 0   | 22    |
| OCLO                           | HV313              | ClO                            | O( <sup>3</sup> P) | $1.74 \times 10^{-18}$  | 0        | 0 | 0                     | 0    | 0   | 22    |
| OCLO                           | HV369              | ClO                            | O( <sup>3</sup> P) | $9.03 \times 10^{-18}$  | 0        | 0 | 0                     | 0    | 0   | 22    |
| OCLO                           | O( <sup>3</sup> P) | ClO                            | O <sub>2</sub>     | $2.4 \times 10^{-12}$   | 960      | 0 | 0                     | 0    | 0   | 9     |
| OCLO                           | O( <sup>3</sup> P) | ClO <sub>3</sub>               |                    | $3.11 \times 10^{-11}$  | 0        | 1 | 1.91E-31              | 0    | 0   | 9     |
| OCLO                           | OH                 | O <sub>2</sub>                 | HOCl               | $1.4 \times 10^{-12}$   | -600     | 0 | 0                     | 0    | 0   | 9     |
| OCLO                           | Cl                 | 2 ClO                          |                    | $3.2 \times 10^{-11}$   | -169.593 | 0 | 0                     | 0    | 0   | 9     |
| OCLO                           | ClO                | Cl <sub>2</sub> O <sub>3</sub> |                    | $2.4 \times 10^{-11}$   | 0        | 0 | $6.2 \times 10^{-32}$ | 0    | 4.7 | 9     |
| OCLO                           | Br                 | ClO                            | BrO                | $2.7 \times 10^{-11}$   | 1300.22  | 0 | 0                     | 0    | 0   | 9     |
| ClOO                           | HV254              | ClO                            | O( <sup>3</sup> P) | $1.24 \times 10^{-17}$  | 0        | 0 | 0                     | 0    | 0   | 26    |
| ClOO                           |                    | Cl                             | O <sub>2</sub>     | 0                       | 0        | 0 | $2.8 \times 10^{-10}$ | 1820 | 0   | 9     |
| ClOO                           | H                  | ClO                            | OH                 | $5.65 \times 10^{-11}$  | 0        | 0 | 0                     | 0    | 0   | 20    |
| ClOO                           | O( <sup>3</sup> P) | ClO                            | O <sub>2</sub>     | $4.98 \times 10^{-11}$  | 0        | 0 | 0                     | 0    | 0   | 27    |
| ClOO                           | Cl                 | Cl <sub>2</sub>                | O <sub>2</sub>     | $2.3 \times 10^{-10}$   | 0        | 0 | 0                     | 0    | 0   | 23    |
| ClOO                           | Cl                 | 2 ClO                          |                    | $1.2 \times 10^{-11}$   | 0        | 0 | 0                     | 0    | 0   | 23    |
| ClOO                           | Br                 | O <sub>2</sub>                 | BrCl               | $5.15 \times 10^{-14}$  | 0        | 0 | 0                     | 0    | 0   | 28    |
| Cl <sub>2</sub> O              | HV254              | ClO                            | Cl                 | $1.84 \times 10^{-18}$  | 0        | 0 | 0                     | 0    | 0   | 29,30 |
| Cl <sub>2</sub> O              | HV313              | Cl <sub>2</sub>                | Cl                 | $3.94 \times 10^{-19}$  | 0        | 0 | 0                     | 0    | 0   | 29,30 |
| Cl <sub>2</sub> O              | HV369              | Cl <sub>2</sub>                | Cl                 | $5.43 \times 10^{-21}$  | 0        | 0 | 0                     | 0    | 0   | 29,30 |
| Cl <sub>2</sub> O              | H                  | ClO                            | HCl                | $4.1 \times 10^{-11}$   | 0        | 0 | 0                     | 0    | 0   | 31    |
| Cl <sub>2</sub> O              | O( <sup>3</sup> P) | 2 ClO                          |                    | $2.7 \times 10^{-11}$   | 530      | 0 | 0                     | 0    | 0   | 9     |
| Cl <sub>2</sub> O              | OH                 | HOCl                           | ClO                | $5.1 \times 10^{-12}$   | -100     | 0 | 0                     | 0    | 0   | 32    |
| Cl <sub>2</sub> O              | Cl                 | Cl <sub>2</sub>                | ClO                | $6.20 \times 10^{-11}$  | 129.901  | 0 | 0                     | 0    | 0   | 9     |
| Cl <sub>2</sub> O              | ClO                | Cl <sub>2</sub>                | ClOO               | $4.32 \times 10^{-16}$  | 0        | 0 | 0                     | 0    | 0   | 27    |
| Cl <sub>2</sub> O              | ClO                | Cl <sub>2</sub>                | Cl                 | $1.08 \times 10^{-15}$  | 0        | 0 | 0                     | 0    | 0   | 27    |
| Cl <sub>2</sub> O              | Br                 | ClO                            | BrCl               | $2.1 \times 10^{-11}$   | 470.291  | 0 | 0                     | 0    | 0   | 9     |
| Cl <sub>2</sub> O <sub>2</sub> | HV254              | ClOO                           | Cl                 | $6.01 \times 10^{-18}$  | 0        | 0 | 0                     | 0    | 0   | 30,33 |
| Cl <sub>2</sub> O <sub>2</sub> | HV313              | ClOO                           | Cl                 | $3.81 \times 10^{-19}$  | 0        | 0 | 0                     | 0    | 0   | 30,33 |
| Cl <sub>2</sub> O <sub>2</sub> | HV369              | ClOO                           | Cl                 | $4.76 \times 10^{-20}$  | 0        | 0 | 0                     | 0    | 0   | 30,33 |
| Cl <sub>2</sub> O <sub>2</sub> |                    | 2 ClO                          |                    | $3.7 \times 10^{-7}$    | 7690.64  | 0 | 0                     | 0    | 0   | 9     |
| Cl <sub>2</sub> O <sub>2</sub> | OH                 | HOCl                           | ClOO               | $6 \times 10^{-13}$     | -670     | 0 | 0                     | 0    | 0   | 32    |
| Cl <sub>2</sub> O <sub>2</sub> | Cl                 | Cl <sub>2</sub>                | ClOO               | $7.6 \times 10^{-11}$   | -65      | 0 | 0                     | 0    | 0   | 9     |
| Cl <sub>2</sub> O <sub>2</sub> | Br                 | ClOO                           | BrCl               | $5.9 \times 10^{-12}$   | 169.593  | 0 | 0                     | 0    | 0   | 9     |
| Cl <sub>2</sub> O <sub>3</sub> | HV254              |                                |                    | $1.443 \times 10^{-17}$ | 0        | 0 | 0                     | 0    | 0   | 22    |
| Cl <sub>2</sub> O <sub>3</sub> | HV313              |                                |                    | $1.86 \times 10^{-18}$  | 0        | 0 | 0                     | 0    | 0   | 22    |
| Cl <sub>2</sub> O <sub>3</sub> |                    | ClO                            | OCLO               | $1.4 \times 10^{-10}$   | 3810.44  | 0 | 0                     | 0    | 0   | 9     |
| BrO                            | HV369              | Br                             | O( <sup>3</sup> P) | $1.01 \times 10^{-18}$  | 0        | 0 | 0                     | 0    | 0   | 34    |
| BrO                            | O( <sup>3</sup> P) | BrO <sub>2</sub>               |                    | $5 \times 10^{-11}$     | 0        | 0 | 0                     | 0    | 0   | 34    |
| BrO                            | O( <sup>3</sup> P) | Br                             | O <sub>2</sub>     | $1.9 \times 10^{-11}$   | -230     | 0 | 0                     | 0    | 0   | 9     |
| BrO                            | OH                 | O <sub>2</sub>                 | HBr                | $1 \times 10^{-12}$     | 0        | 0 | 0                     | 0    | 0   | 35    |
| BrO                            | OH                 |                                |                    | $1.8 \times 10^{-11}$   | -250.18  | 0 | 0                     | 0    | 0   | 9     |
| BrO                            | HO <sub>2</sub>    | O <sub>2</sub>                 | HOBr               | $6.19 \times 10^{-12}$  | 500.361  | 0 | 0                     | 0    | 0   | 36    |
| BrO                            | BrO                | Br                             | BrO <sub>2</sub>   | $5.25 \times 10^{-11}$  | 449.844  | 0 | 0                     | 0    | 0   | 37    |
| BrO                            | BrO                | O <sub>2</sub>                 | 2 Br               | $2.7 \times 10^{-12}$   | 0        | 0 | 0                     | 0    | 0   | 9     |
| BrO                            | BrO                | Br <sub>2</sub>                | O <sub>2</sub>     | $2.5 \times 10^{-14}$   | 0        | 0 | 0                     | 0    | 0   | 9     |
| BrO <sub>2</sub>               | HV421              | BrO                            | O( <sup>3</sup> P) | $5.70 \times 10^{-18}$  | 0        | 0 | 0                     | 0    | 0   | 22    |
| BrO <sub>2</sub>               | O( <sup>3</sup> P) | BrO                            | O <sub>2</sub>     | $4.25 \times 10^{-12}$  | 0        | 0 | 0                     | 0    | 0   | 34    |

**Table S1** KinSim mechanism used to model Cl and Br formation and destruction in the OFR (continued).

|                  |                    |                 |                  |                        |         |      |   |   |   |    |
|------------------|--------------------|-----------------|------------------|------------------------|---------|------|---|---|---|----|
| BrO <sub>2</sub> | Br                 |                 |                  | $5 \times 10^{-11}$    | 0       | 0    | 0 | 0 | 0 | 34 |
| BrO <sub>2</sub> | ClO                |                 |                  | $1.5 \times 10^{-13}$  | 0       | 0    | 0 | 0 | 0 | 38 |
| BrO <sub>2</sub> | OCLO               |                 |                  | $6 \times 10^{-14}$    | 0       | 0    | 0 | 0 | 0 | 38 |
| HCl              | H                  | H <sub>2</sub>  | Cl               | $1.32 \times 10^{-11}$ | 1710.37 | 0    | 0 | 0 | 0 | 20 |
| HCl              | O( <sup>1</sup> D) | Cl              | OH               | $1 \times 10^{-10}$    | 0       | 0    | 0 | 0 | 0 | 39 |
| HCl              | O( <sup>1</sup> D) | ClO             | H                | $3.6 \times 10^{-11}$  | 0       | 0    | 0 | 0 | 0 | 39 |
| HCl              | O( <sup>3</sup> P) | Cl              | OH               | $1 \times 10^{-11}$    | 3300    | 0    | 0 | 0 | 0 | 23 |
| HCl              | OH                 | Cl              | H <sub>2</sub> O | $1.72 \times 10^{-12}$ | 229.733 | 0    | 0 | 0 | 0 | 9  |
| HOCl             | HV254              | OH              | Cl               | $1.46 \times 10^{-19}$ | 0       | 0    | 0 | 0 | 0 | 40 |
| HOCl             | HV313              | OH              | Cl               | $5.84 \times 10^{-20}$ | 0       | 0    | 0 | 0 | 0 | 40 |
| HOCl             | HV369              | OH              | Cl               | $9.19 \times 10^{-21}$ | 0       | 0    | 0 | 0 | 0 | 40 |
| HOCl             | H                  | HCl             | OH               | $6.71 \times 10^{-13}$ | 0       | 0    | 0 | 0 | 0 | 41 |
| HOCl             | O( <sup>3</sup> P) | ClO             | OH               | $1.7 \times 10^{-13}$  | 0       | 0    | 0 | 0 | 0 | 9  |
| HOCl             | OH                 | ClO             | H <sub>2</sub> O | $3.01 \times 10^{-12}$ | 500     | 0    | 0 | 0 | 0 | 23 |
| HOCl             | Cl                 | ClO             | HCl              | $3.4 \times 10^{-12}$  | 130     | 0    | 0 | 0 | 0 | 23 |
| HOCl             | Cl                 | OH              | Cl <sub>2</sub>  | $3.4 \times 10^{-13}$  | 0       | 0    | 0 | 0 | 0 | 41 |
| HBr              | H                  | Br              | H <sub>2</sub>   | $8.32 \times 10^{-12}$ | 81.7898 | 1.05 | 0 | 0 | 0 | 42 |
| HBr              | O( <sup>1</sup> D) |                 |                  | $1.5 \times 10^{-10}$  | 0       | 0    | 0 | 0 | 0 | 23 |
| HBr              | O( <sup>3</sup> P) | Br              | OH               | $5.8 \times 10^{-12}$  | 1500    | 0    | 0 | 0 | 0 | 23 |
| HBr              | OH                 | Br              | H <sub>2</sub> O | $6.7 \times 10^{-12}$  | -155.16 | 0    | 0 | 0 | 0 | 9  |
| HBr              | Cl                 | Br              | HCl              | $7.8 \times 10^{-12}$  | 0       | 0    | 0 | 0 | 0 | 20 |
| HBr              | ClO                | Br              | HOCl             | $5.60 \times 10^{-15}$ | 0       | 0    | 0 | 0 | 0 | 43 |
| HBr              | BrO                | Br              | HOBr             | $6.19 \times 10^{-15}$ | 0       | 0    | 0 | 0 | 0 | 43 |
| HOBr             | HV254              | OH              | Br               | $6.19 \times 10^{-20}$ | 0       | 0    | 0 | 0 | 0 | 22 |
| HOBr             | HV369              | OH              | Br               | $9.32 \times 10^{-20}$ | 0       | 0    | 0 | 0 | 0 | 22 |
| HOBr             | HV421              | OH              | Br               | $9.67 \times 10^{-21}$ | 0       | 0    | 0 | 0 | 0 | 22 |
| HOBr             | O( <sup>3</sup> P) | BrO             | OH               | $1.2 \times 10^{-10}$  | 430.6   | 0    | 0 | 0 | 0 | 9  |
| HOBr             | OH                 |                 |                  | $5 \times 10^{-13}$    | 0       | 0    | 0 | 0 | 0 | 44 |
| HOBr             | Cl                 | BrCl            | OH               | $8 \times 10^{-11}$    | 0       | 0    | 0 | 0 | 0 | 44 |
| BrCl             | HV254              | Br              | Cl               | $3.24 \times 10^{-20}$ | 0       | 0    | 0 | 0 | 0 | 5  |
| BrCl             | HV313              | Br              | Cl               | $2.51 \times 10^{-20}$ | 0       | 0    | 0 | 0 | 0 | 5  |
| BrCl             | HV369              | Br              | Cl               | $3.96 \times 10^{-19}$ | 0       | 0    | 0 | 0 | 0 | 5  |
| BrCl             | HV421              | Br              | Cl               | $1.78 \times 10^{-19}$ | 0       | 0    | 0 | 0 | 0 | 5  |
| BrCl             | O( <sup>3</sup> P) | BrO             | Cl               | $2.09 \times 10^{-11}$ | 0       | 0    | 0 | 0 | 0 | 45 |
| BrCl             | OH                 |                 |                  | $1.5 \times 10^{-12}$  | 0       | 0    | 0 | 0 | 0 | 44 |
| BrCl             | Cl                 | Cl <sub>2</sub> | Br               | $1.45 \times 10^{-11}$ | 0       | 0    | 0 | 0 | 0 | 46 |
| BrCl             | Br                 | Br <sub>2</sub> | Cl               | $3.32 \times 10^{-15}$ | 0       | 0    | 0 | 0 | 0 | 20 |

## References

- 1 B. Ghosh, D. K. Papanastasiou and J. B. Burkholder, *The Journal of Chemical Physics*, 2012, **137**, 164315.
- 2 J. E. Tuttle and G. K. Rollefson, *J. Am. Chem. Soc.*, 1941, **63**, 1525–1530.
- 3 H. Shimada, R. Shimada and Y. Kanda, *Bulletin of the Chemical Society of Japan*, 1968, **41**, 1289–1295.
- 4 D. Maric, J. Burrows, R. Meller and G. Moortgat, *Journal of Photochemistry and Photobiology A: Chemistry*, 1993, **70**, 205 – 214.
- 5 D. Maric, J. Burrows and G. Moortgat, *Journal of Photochemistry and Photobiology A: Chemistry*, 1994, **83**, 179 – 192.
- 6 N. L. Ng, M. R. Canagaratna, J. L. Jimenez, P. S. Chhabra, J. H. Seinfeld and D. R. Worsnop, *Atmospheric Chemistry and Physics*, 2011, **11**, 6465–6474.
- 7 I. S. Fletcher and D. Husain, *Berichte der Bunsengesellschaft für physikalische Chemie*, 1976, **80**, 982–985.
- 8 K. Freudenstein and D. Biedenkapp, *Colloid and Polymer Science*, 1977, **255**, 928–928.
- 9 R. Atkinson, D. L. Baulch, R. A. Cox, J. N. Crowley, R. F. Hampson, R. G. Hynes, M. E. Jenkin, M. J. Rossi and J. Troe, *Atmospheric Chemistry and Physics*, 2007, **7**, 981–1191.
- 10 E. Hutton and M. Wright, *Trans. Faraday Soc.*, 1965, **61**, 78–89.
- 11 D. A. Dolson and S. R. Leone, *The Journal of Physical Chemistry*, 1987, **91**, 3543–3550.
- 12 W. G. Burns and F. S. Dainton, *Trans. Faraday Soc.*, 1952, **48**, 39–52.
- 13 A. V. Baklanov and L. N. Krasnoperov, *J. Phys. Chem. A*, 2001, **105**, 97–103.
- 14 M. H. Harwood, D. M. Rowley, R. A. Cox and R. L. Jones, *J. Phys. Chem. A*, 1998, **102**, 1790–1802.
- 15 Y. Bedjanian, G. Laverdet and G. Le Bras, *J. Phys. Chem. A*, 1998, **102**, 953–959.
- 16 C.-C. Wu, H.-C. Lin, Y.-B. Chang, P.-Y. Tsai, Y.-Y. Yeh, H. Fan, K.-C. Lin and J. S. Francisco, *The Journal of Chemical Physics*, 2011, **135**, 234308.
- 17 J. Burrows, A. Richter, A. Dehn, B. Deters, S. Himmelmann, S. Voigt and J. Orphal, *Journal of Quantitative Spectroscopy and Radiative Transfer*, 1999, **61**, 509–517.
- 18 R. Atkinson, D. Baulch, R. Cox, J. Crowley, J. Hampson, R.F. J. Kerr, M. Rossi and J. Troe, *IUPAC Subcommittee on Gas Kinetic Data Evaluation for Atmospheric Chemistry - Web Version*, 2001.
- 19 Z. Li, *J. Phys. Chem. A*, 1999, **103**, 1206–1213.
- 20 D. L. Baulch, J. Duxbury, S. J. Grant and D. C. Montague, *J. Phys. Chem. Ref. Data*, 1981, **10**, year.
- 21 A. D. Hewitt, K. M. Brahan, G. D. Boone and S. A. Hewitt, *International Journal of Chemical Kinetics*, 1996, **28**, 763–771.
- 22 S. Sander, R. Friedl, D. Golden, M. Kurylo, G. Moortgat, H. Keller-Rudek, P. Wine, A. R. Ravishankara, C. Kolb, M. Molina, B. Finlayson-Pitts, R. Huie and V. Orkin, *JPL Publication*, 2006, 1–523.
- 23 W. B. DeMore, S. P. Sander, D. M. Golden, R. F. Hampson, M. J. Kurylo, C. J. Howard, A. R. Ravishankara, C. E. Kolb and M. J. Molina, *JPL Publication 97-4*, 1997.
- 24 R. Atkinson, D. L. Baulch, R. A. Cox, R. F. Hampson, J. A. Kerr (Chairman) and J. Troe, *Journal of Physical and Chemical Reference Data*, 1989, **18**, 881–1097.
- 25 A. Horowitz, D. Bauer, J. N. Crowley and G. K. Moortgat, *Geophysical Research Letters*, 1993, **20**, 1423–1426.
- 26 H. S. Johnston, E. D. Morris and J. Van den Bogaerde, *J. Am. Chem. Soc.*, 1969, **91**, 7712–7727.
- 27 N. Basco, S. K. Dogra and R. G. W. Norrish, *Proceedings of the Royal Society of London. A. Mathematical and Physical Sciences*, 1971, **323**, 401–415.
- 28 M. A. A. Clyne, J. A. Coxon and J. W. Linnett, *Proceedings of the Royal Society of London. Series A. Mathematical and Physical Sciences*, 1967, **298**, 424–452.
- 29 C. M. Nelson, T. A. Moore, M. Okumura and T. K. Minton, *The Journal of Chemical Physics*, 1994, **100**, 8055–8064.
- 30 D. K. Papanastasiou, K. J. Feierabend and J. B. Burkholder, *The Journal of Chemical Physics*, 2011, **134**, 204310.
- 31 S. J. Wategaonkar and D. W. Setser, *The Journal of Chemical Physics*, 1989, **90**, 251–264.
- 32 J. C. Hansen, R. R. Friedl and S. P. Sander, *J. Phys. Chem. A*, 2008, **112**, 9229–9237.
- 33 T. A. Moore, M. Okumura, J. W. Seale and T. K. Minton, *J. Phys. Chem. A*, 1999, **103**, 1691–1695.
- 34 N. Butkovskaya, I. Morozov, V. Tal'rose and E. Vasiliev, *Chemical Physics*, 1983, **79**, 21–30.
- 35 Y. Bedjanian, V. Riffault, G. Le Bras and G. Poulet, *J. Phys. Chem. A*, 2001, **105**, 6154–6166.
- 36 W. DeMore, S. Sander, D. Golden, R. Hampson, M. Kurylo, C. Howard, A. Ravishankara, C. Kolb and M. Molina, *JPL Publication 94-26*, 1994.
- 37 M. A. A. Clyne and H. W. Cruse, *Trans. Faraday Soc.*, 1970, **66**, 2214–2226.
- 38 Z. Li, G. R. Jeong and E. C. Person, *International Journal of Chemical Kinetics*, 2002, **34**, 430–437.
- 39 A. Chichinin, *Chemical Physics Letters - CHEM PHYS LETT*, 2000, **316**, 425–432.
- 40 R. J. Barnes, A. Sinha and H. A. Michelsen, *J. Phys. Chem. A*, 1998, **102**, 8855–8859.

- 41 R. Vogt and R. N. Schindler, *Berichte der Bunsengesellschaft für physikalische Chemie*, 1993, **97**, 819–829.
- 42 M. Seakins, P.W.; Pilling, *J. Phys. Chem.*, 1991, 9878–9881.
- 43 A. A. Turnipseed, J. W. Birks and J. G. Calvert, *J. Phys. Chem.*, 1991, **95**, 4356–4364.
- 44 A. Kukui, U. Kirchner, T. Benter and R. N. Schindler, *ChemInform*, 1996, **27**, year.
- 45 M. A. A. Clyne, P. B. Monkhouse and L. W. Townsend, *International Journal of Chemical Kinetics*, 1976, **8**, 425–449.
- 46 M. A. A. Clyne and H. W. Cruse, *J. Chem. Soc., Faraday Trans. 2*, 1972, **68**, 1377–1387.
